# Supplementary material
Source: Elsevier journal article supplement (https://www.sciencedirect.com/science/article/pii/S1413867019304271)
Supplement: mmc1 [file S1413867019304271:mmc1.docx]

National and Yucatan cases source: Open Access Epidemiologic Surveillance system documents accessed from the Board of Health Departments for Access to Health Information.
